# Supplementary material for: Comprehensive Analyses of Four PtoNF-YC Genes from Populus tomentosa and Impacts on Flowering Timing
Source: MDPI journal article supplement (doi:10.3390/ijms23063116), 2022-03-14
Supplement: s1 [file s1]

**Table S1.** Primer sequences of this study.

| Name               | Sequence (5'-3')                      | Usage   |
|--------------------|---------------------------------------|---------|
| <i>PtoNF-YC5-F</i> | GCGT <u>TCGAC</u> ATGGAGCAAGG         | Cloning |
| <i>PtoNF-YC5-R</i> | GG <u>ACTAGT</u> CTGAGGGCGACTG        |         |
| <i>PtoNF-YC6-F</i> | GCGT <u>TCGAC</u> ATGGATCAGCAAG       |         |
| <i>PtoNF-YC6-R</i> | GG <u>ACTAGT</u> CTACTGATCTGAGGGTGAC  |         |
| <i>PtoNF-YC7-F</i> | GCGT <u>TCGAC</u> ATGATGGGACCTT       |         |
| <i>PtoNF-YC7-R</i> | GG <u>ACTAGT</u> TCAGGAATCTTCAGGTGGC  |         |
| <i>PtoNF-YC8-F</i> | GCGT <u>TCGAC</u> ATGGACCAGCA         |         |
| <i>PtoNF-YC8-R</i> | GG <u>ACTAGT</u> TCAGGAATCTTCAGGTGGCT |         |
| <i>PtoNF-YC5-F</i> | CGGTCTTGGAATCACACGGA                  | qRT-PCR |
| <i>PtoNF-YC5-R</i> | CCGACAGGCATTGTTCTCT                   |         |
| <i>PtoNF-YC6-F</i> | GAACAATGCCTGTTGGAGGG                  |         |
| <i>PtoNF-YC6-R</i> | TGTCACAGGCTTGCCCATTA                  |         |
| <i>PtoNF-YC7-F</i> | AGTCCCGAGAGGGAGTCTTC                  |         |
| <i>PtoNF-YC7-R</i> | TTTGCTGTGGCCAAATCTGC                  |         |
| <i>PtoNF-YC8-F</i> | GGAAAGCCTGTGGTGGATCA                  |         |
| <i>PtoNF-YC8-R</i> | AGGAATCTTCAGGTGGCTGC                  |         |
| <i>AtCO-F</i>      | CAGGCAAACAGTGTATGCACCAGG              |         |
| <i>AtCO-R</i>      | CCGCAGCCACTCTCCCTCTG                  |         |
| <i>AtSOC-F</i>     | GGGATCTCATGAAAGCGAAGTTTG              |         |
| <i>AtSOC-R</i>     | CTTGAAGAACAAGGTAACCCAATGAA            |         |
| <i>AtSVP-F</i>     | GGAAAACTGTTTCGAGTTCTG                 |         |
| <i>AtSVP-R</i>     | TCTTTGTTTCAATCACACGC                  |         |
| <i>AtFT-F</i>      | AGAAGACTTTAGATGGCTTCTT                |         |
| <i>AtFT-R</i>      | TTATCGCATCACACACTATATAAG              |         |
| <i>AGL-F</i>       | GGCTGGAGAAACTACTTGAA                  |         |
| <i>AGL-R</i>       | TTTAAGCGTCGTCAGTTTTG                  |         |
| <i>API-F</i>       | CATGGGTGGTCTGTATCAAGAAGAT             |         |
| <i>API-R</i>       | CATGCGGCGAAGCAGCCAAGGTT               |         |
| <i>AtSEP3-F</i>    | CGGTCGTCATCATCATCAACA                 |         |
| <i>AtSEP3-R</i>    | GTCCTGCTCCCATTCCATCTT                 |         |
| <i>PtACTIN-F</i>   | CTCCATCATGAAATGCGATG                  |         |
| <i>PtACTIN-R</i>   | TTGGGGCTAGTGCTGAGATT                  |         |

|                |                                  |              |
|----------------|----------------------------------|--------------|
| <i>AtUBQ-F</i> | GGGCACTCAAGTATCTTGTTAGC          |              |
| <i>AtUBQ-R</i> | TGCTGCCCCAACATCAGGTT             |              |
| AD-PtCOL1-F    | CGGAATTTCATGCCACGTGTCAC          |              |
| AD-PtCOL1-R    | CGGGATCCGAATGATGGGACAAT          |              |
| AD-PtCOL2-F    | CGGAATTTCATGTTGAAGCAAGAGAGTAGTGG |              |
| AD-PtCOL2-R    | CGGGATCCGAATGATGGGACAAT          | Y2H vector   |
| BD-PtNF-YC6-F  | CGGAATTTCATGGATCAGCAAGGGTATGGG   | construction |
| BD-PtNF-YC6-R  | CGGGATCCCTGATCTGAGGGTGACTGCTG    |              |
| BD-PtNF-YC8-F  | CGGAATTTCATGGACCAGCAAGGCCATG     |              |
| BD-PtNF-YC8-R  | CGGGATCCGAATCTTCAGGTGGCTGCT      |              |

**Table S2.** Comparison of similarity between PtoNF-YC5/6/7/8 protein and AtNF-YC3/9 protein.

| Gene Members    | PtoNF-YC5 | PtoNF-YC6 | PtoNF-YC7 | PtoNF-YC8 |
|-----------------|-----------|-----------|-----------|-----------|
| <b>AtNF-YC3</b> | 43.97%    | 55.00%    | 32.39%    | 46.51%    |
| <b>AtNF-YC9</b> | 51.74%    | 58.44%    | 36.06%    | 53.10%    |

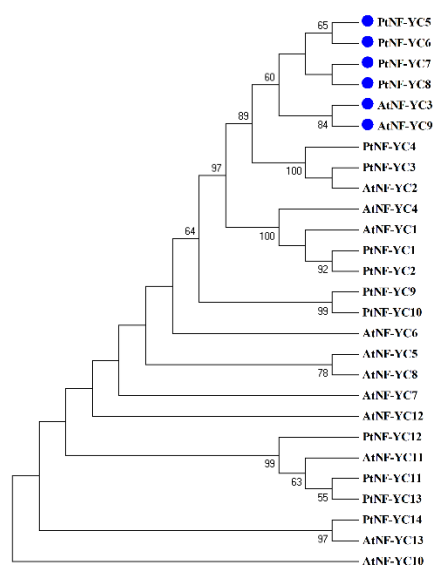

**Figure S1.** Phylogenetic trees constructed by NF-Y proteins from Arabidopsis and *Populus*.

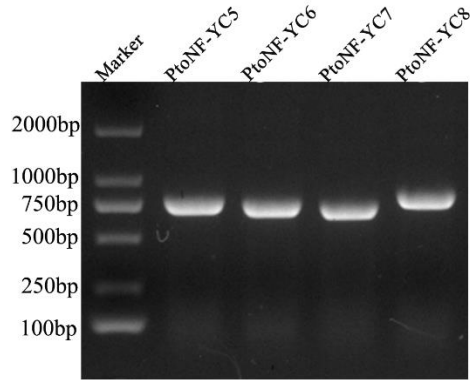

**Figure S2.** Amplification of the CDS of *PtoNF-YC5/6/7/8*.

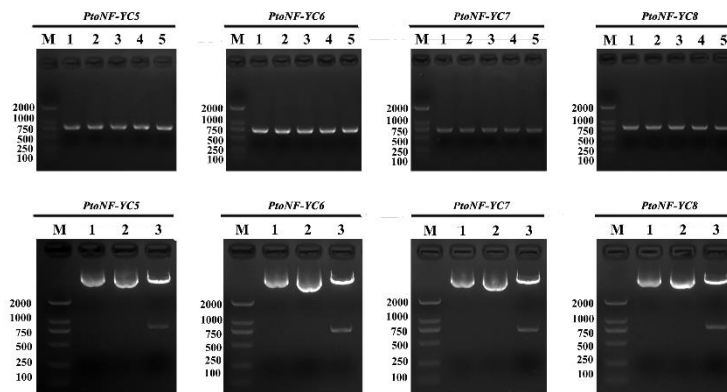

**Figure S3.** pSuper1300-GFP-PtoNF-YC5/6/7/8 bacterial liquid PCR and plasmid double enzyme digestion identification. M: 2000 DNA Maker, (below) 1: pSuper1300-GFP empty vector, 2: pSuper1300-GFP-PtoNF-YC5/6/7/8 vector, 3: pSuper1300-GFP-PtoNF-YC5/6/7/8 plasmid double restriction digestion identification.

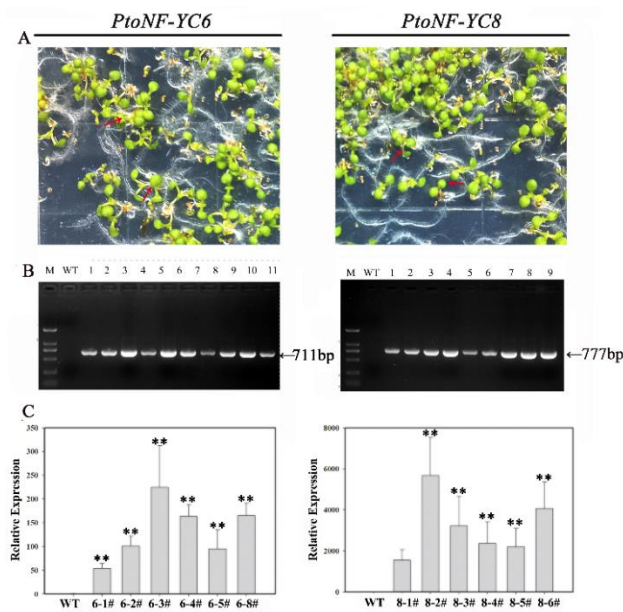

**Figure S4.** Identification of *PtoNF-YC6* and *PtoNF-YC8* transgenic Arabidopsis. (A) Hygromycin screening of transgenic Arabidopsis. (B) DNA level identification the transgenic Arabidopsis. (C) Transcription level analysis. \*\*  $p < 0.01$ .

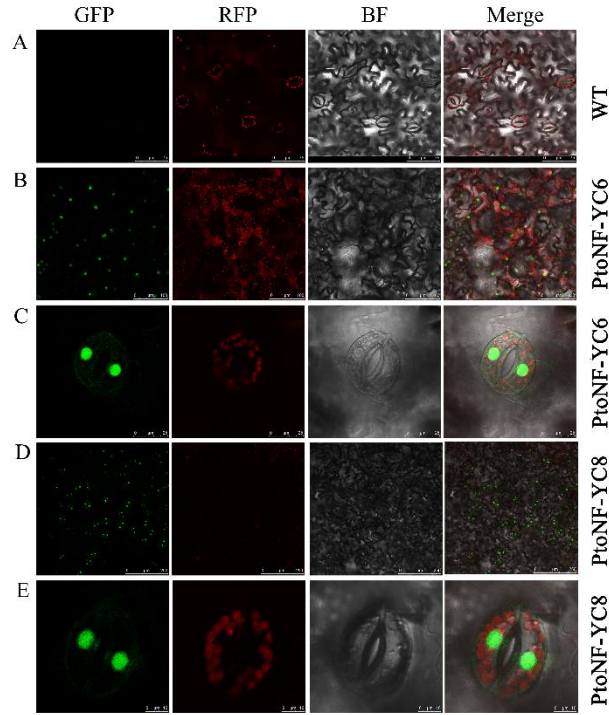

**Figure S5.** *PtoNF-YC6* and *PtoNF-YC8* visualized under fluorescence microscopy in transgenic Arabidopsis. (A) Leaf fluorescence signal of wild-type seedlings. (B,D). Leaf fluorescence signal of transgenic *PtoNF-YC6* and *PtoNF-YC8* plants, bar 100μm. (C,E). Fluorescence signal of *PtoNF-YC6* and *PtoNF-YC8* transgenic leaf guard cells, bar 25 μm.

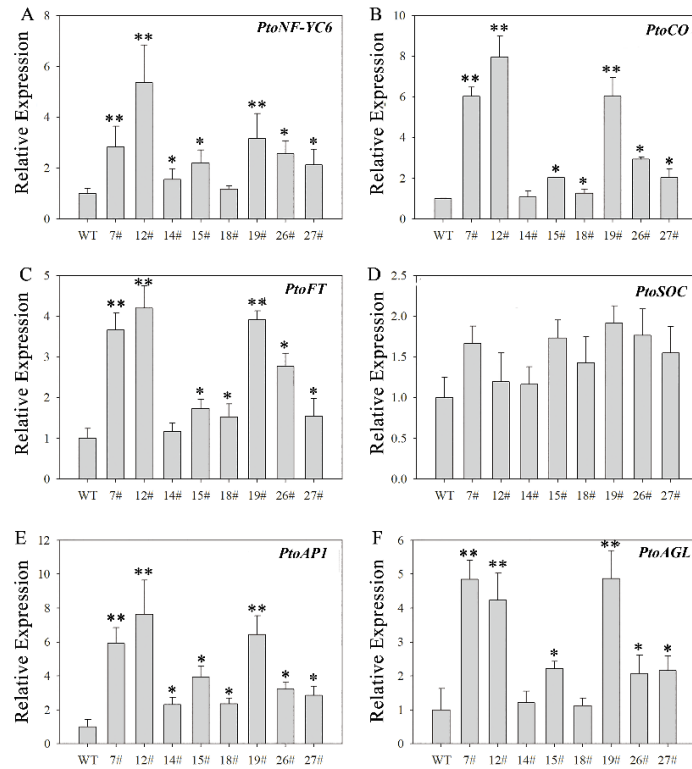

**Figure S6.** Expression analysis of *PtoNF-YC6* and endogenous flowering genes of *P. tomentosa* (A–F). \*  $p < 0.05$ , \*\*  $p < 0.01$ .

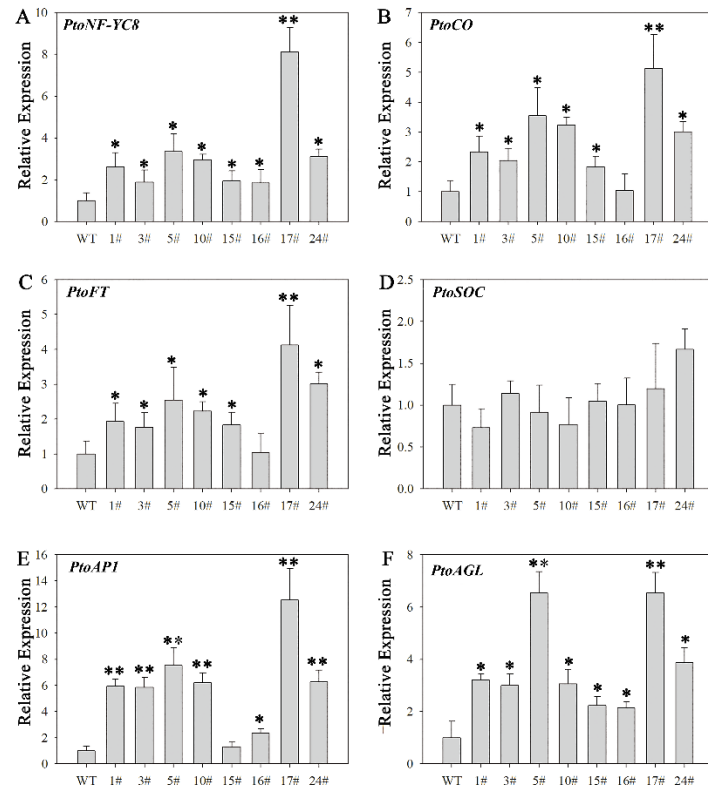

**Figure S7.** Expression analysis of *PtoNF-YC8* and endogenous flowering genes of *P. tomentosa* (A–F). \*  $p < 0.05$ , \*\*  $p < 0.01$ .
